# Supplementary material for: Trace Metal Contamination in Community Garden Soils across the United States
Source: MDPI journal article supplement (doi:10.3390/su16051831), 2024-02-23
Supplement: s1 [file s1]

## Supplementary Information

### Trace metal contamination in community garden soils across the United States

Maeve Malone and Kabindra M. Shakya\*

\*Corresponding Author:

Kabindra M. Shakya

Department of Geography and the Environment

Villanova University

800 E Lancaster Avenue, Villanova, PA 19085, USA

Email: kabindra.shakya@villanova.edu

**Table S1: Trace Metal Soil Testing Sites Across the United States**

| Location         | Lab Name                                                             | Test Name                            | Heavy Metals Measured                                                               | Cost                              | Link                                                                                                                                                                                                                                                                                                                          |
|------------------|----------------------------------------------------------------------|--------------------------------------|-------------------------------------------------------------------------------------|-----------------------------------|-------------------------------------------------------------------------------------------------------------------------------------------------------------------------------------------------------------------------------------------------------------------------------------------------------------------------------|
| Ithica, NY       | Cornell Nutrient Analysis Laboratory                                 | 2021 Toxic Metals and Trace Elements | As, Ba, Be, Ca, Cd, Co, Cr, Cu, Fe, Li, Mg, Mn, Mo, Ni, P, Pb, S, Se, Sr, Ti, V, Zn | \$30                              | <a href="https://www.css.cornell.edu/cnal-forms/CNAL_Form_S.pdf">https://www.css.cornell.edu/cnal-forms/CNAL_Form_S.pdf</a>                                                                                                                                                                                                   |
| Portland, OR     | A&L Western Laboratories Inc.                                        |                                      | Zn, Mn, Fe, & Cu                                                                    | Call to inquirer as prices change | <a href="https://al-labs-west.com/soil-analysis/">https://al-labs-west.com/soil-analysis/</a>                                                                                                                                                                                                                                 |
| Fort Collins, CO | Colorado State University: Soil, Water, and Plant Testing Laboratory | S1                                   | Zn, Mn, Fe, & Cu                                                                    | \$40                              | <a href="https://agsci.colostate.edu/divi-soiltestinglab/wp-content/uploads/sites/140/2023/02/soil-lab-crop-form-test-codes-prices-revised-10142022-fillable.pdf">https://agsci.colostate.edu/divi-soiltestinglab/wp-content/uploads/sites/140/2023/02/soil-lab-crop-form-test-codes-prices-revised-10142022-fillable.pdf</a> |

|                   |                                                                      |                                          |                                          |                                                                              |                                                                                                                                                                                                                                       |
|-------------------|----------------------------------------------------------------------|------------------------------------------|------------------------------------------|------------------------------------------------------------------------------|---------------------------------------------------------------------------------------------------------------------------------------------------------------------------------------------------------------------------------------|
| Fort Collins, CO  | Colorado State University: Soil, Water, and Plant Testing Laboratory | S8                                       | As, Pb, Mo, Cr, Se, & Cd                 | \$140                                                                        | <a href="https://agsci.colostate.edu/soiltestinglab/price-list/">https://agsci.colostate.edu/soiltestinglab/price-list/</a>                                                                                                           |
| State College, PA | Penn State Agricultural Analytical Services Lab                      | Total Sorbed Metals Test                 | Ca, Cu, Pb, Ni, Cr, & Zn                 | \$90                                                                         | <a href="https://agsci.psu.edu/aasl/soil-testing/environmental">https://agsci.psu.edu/aasl/soil-testing/environmental</a>                                                                                                             |
| State College, PA | Penn State Agricultural Analytical Services Lab                      | Total Sorbed Metals Test II Plus Mercury | Ca, Cu, Pb, Ni, Cr, Sn, As, Hg, Mo, & Se | \$160                                                                        | <a href="https://agsci.psu.edu/aasl/soil-testing/environmental">https://agsci.psu.edu/aasl/soil-testing/environmental</a>                                                                                                             |
| Amherst, MA       | Umass Amherst Soil and Plant Nutrient Testing Laboratory             | Total Sorbed Metals Test                 | Pb, Ni, Cu, Cd, Cr,                      | \$55 *As, Se, & Mo can also be tested with an additional \$5 charge for each | <a href="https://ag.umass.edu/services/soil-plant-nutrient-testing-laboratory/ordering-information-forms">https://ag.umass.edu/services/soil-plant-nutrient-testing-laboratory/ordering-information-forms</a>                         |
| Newark, DE        | University of Delaware: Delaware Soil Testing Program                | Heavy Metal Screening Test               | As, Cd, Cr, Ni, Pb, Cu, and Zn           | \$30                                                                         | <a href="https://www.udel.edu/canr/cooperative-extension/environmental-stewardship/soil-testing/">https://www.udel.edu/canr/cooperative-extension/environmental-stewardship/soil-testing/</a>                                         |
| Orono, ME         | University of Maine Analytical Lab and Maine Soil Testing Service    | Standard Soil Test                       | Cu, Fe, Mn, & Zn                         | \$18                                                                         | <a href="https://umaine.edu/soiltestinglab/home/prices/">https://umaine.edu/soiltestinglab/home/prices/</a>                                                                                                                           |
| Blacksburg, VA    | Virginia Tech Soil Testing Lab                                       | Routine Soil Test Package                | Zn, Mn, Fe, & Cu                         | In state: \$10<br>Out of state: \$16                                         | <a href="https://www.soiltest.vt.edu/">https://www.soiltest.vt.edu/</a>                                                                                                                                                               |
| Omaha, NE         | Midwest Laboratories                                                 | S4                                       | Zn, Mn, Fe, & Cu                         | \$9.66                                                                       | <a href="https://midwestlabs.com/agriculture">https://midwestlabs.com/agriculture</a>                                                                                                                                                 |
| Columbia, MO      | University of Missouri Soil and                                      | Zn, Mn, Fe, & Cu                         | Zn, Mn, Fe, & Cu                         | \$8.50                                                                       | <a href="https://extension.missouri.edu/programs/soil-and-plant-testing-laboratory/spl-submit-samples/spl-tests-fees">https://extension.missouri.edu/programs/soil-and-plant-testing-laboratory/spl-submit-samples/spl-tests-fees</a> |

|                |                                                                |                                                      |                                                                |        |                                                                                                                                                                                                                                       |
|----------------|----------------------------------------------------------------|------------------------------------------------------|----------------------------------------------------------------|--------|---------------------------------------------------------------------------------------------------------------------------------------------------------------------------------------------------------------------------------------|
|                | Plant testing Laboratory                                       |                                                      |                                                                |        |                                                                                                                                                                                                                                       |
| Columbia, MO   | University of Missouri Soil and Plant testing Laboratory       | Heavy Metals Package                                 | Cd, Co, Mo, Ni, & Pb                                           | \$30   | <a href="https://extension.missouri.edu/programs/soil-and-plant-testing-laboratory/spl-submit-samples/spl-tests-fees">https://extension.missouri.edu/programs/soil-and-plant-testing-laboratory/spl-submit-samples/spl-tests-fees</a> |
| Columbia, MO   | University of Missouri Soil and Plant testing Laboratory       | Trace element package                                | As, Cr, & Se                                                   | \$25   | <a href="https://extension.missouri.edu/programs/soil-and-plant-testing-laboratory/spl-submit-samples/spl-tests-fees">https://extension.missouri.edu/programs/soil-and-plant-testing-laboratory/spl-submit-samples/spl-tests-fees</a> |
| Edinburg, TX   | TPSL                                                           | Customizable Heavy Metals Test - For Soils or Solids | Choose 7 heavy metals                                          | \$70   | <a href="https://www.tpslab.com/store/Heavy-Metal-Testing-c58347011">https://www.tpslab.com/store/Heavy-Metal-Testing-c58347011</a>                                                                                                   |
| Hartwell, GA   | University of Georgia Extension Office                         | S2                                                   | Mg, Zn, Mn, Fe, Cu, Ni, Pb, Cd, Cr, Mo                         | \$13   | <a href="https://extension.uga.edu/county-offices/hart/agriculture-and-natural-resources/testing-services.html">https://extension.uga.edu/county-offices/hart/agriculture-and-natural-resources/testing-services.html</a>             |
| St. Paul, MN   | University of Minnesota Soil Testing Laboratory                | Lead test/Trace elements test                        | Pb, Mg, Ca, Fe, Zn, Cu, & Mn                                   | \$8-42 | <a href="https://soiltest.cfans.umn.edu/testing-services/lawn-garden">https://soiltest.cfans.umn.edu/testing-services/lawn-garden</a>                                                                                                 |
| Raliegh, NC    | North Carolina Department of Agriculture and Consumer Services | Soil test for heavy metals                           | As, Cd, Cr, Pb, Ni, Se                                         | \$25   | <a href="https://www.ncagr.gov/agronomi/fees.htm">https://www.ncagr.gov/agronomi/fees.htm</a>                                                                                                                                         |
| El Segundo, CA | Wallace Laboratories                                           | Standard Agriculture Soil Solubility Analysis        | All 15 non-essential trace metals such as Pb, As, Cd, and more | \$90   | <a href="https://wllabs.com/submit-samples/">https://wllabs.com/submit-samples/</a>                                                                                                                                                   |
