# Supplementary material for: Trace Metal Contamination in Community Garden Soils across the United States
Source: MDPI journal article supplement (doi:10.3390/su16051831), 2024-02-23
Supplement: s1 [file s1]

Archive with 1 entries (1 files):
- sustainability-2835049-supplementary.pdf
